# Supplementary material for: Moving to Capture Children’s Attention: Developing a Methodology for Measuring Visuomotor Attention
Source: PLoS One. 2016 Jul 19;11(7):e0159543. doi: 10.1371/journal.pone.0159543 (PMC4951138; doi:10.1371/journal.pone.0159543)
Supplement: S1 Dataset — Dataset containing the post-processed data for all participants who completed Experiment 1. (XLSX) [file pone.0159543.s001.xlsx]

## Sheet: Data
Demographic Details				Single Target Condition						Coloured-Targets Cue Detection Condition														Shaped-Targets Cue Detection Condition														Combined-Targets (i.e. shape & colour) Cue Detection Condition
P_ID	Age	Gender	Handedness	C_Order_ST	mean_ST	stddev_ST	TE_ST	IIV_ST	RIIV_ST	C_Order_C	mTE_C	stdTE_C	TE_C	IIV_C	RIIV_C	∆TE_C	∆IIV_C	∆RIIV_C	CorrectRs_C	mRT_C	FalseRs_C	IndMovs_C	IndMovs_per_C	C_Order_Sh	mean_Sh	stddev_Sh	TE_Sh	IIV_Sh	RIIV_Sh	∆TE_Sh	∆IIV_Sh	∆RIIV_Sh	CorrectRs_Sh	mRT_Sh	FalseRs_Sh	IndMovs_Sh	IndMovs_per_Sh	C_Order_Cm	mean_Cm	stddev_Cm	TE_Cm	IIV_Cm	RIIV_Cm	∆TE_Cm	∆IIV_Cm	∆RIIV_Cm	CorrectRs_Cm	mRT_Cm	FalseRs_Cm
1	25	2	1	1	10.611	4.2018	3.19705	0.695765	-0.02194	3	14.273	6.4269	3.68395	0.884892	0.05964	0.4869	0.189128	0.08158	0.625	0.65965	0	0	0	4	15.331	7.1211	3.82	0.96	0.1047	0.624	0.263	0.12664	0.711	0.69	0	3	1.3222	2	15.08	6.414	3.8	0.88	0.02912	0.601	0.181	0.05106	0.25	0.93	0
2	23	1	1	2	11.199	4.2319	3.28552	0.701022	-0.03623	4	14.119	5.9956	3.67853	0.858775	0.03472	0.393	0.157752	0.07095	0.83	0.82953	1	1	0.34235	1	15.408	6.6143	3.84	0.9	0.04028	0.554	0.202	0.07651	0.809	0.81	1	1	0.54697	3	15.921	7.2774	3.89	0.97	0.09924	0.601	0.268	0.13546	0.479	1.06	2
3	27	1	1	3	12.132	4.3439	3.42517	0.681383	-0.08671	1	15.836	6.0528	3.91038	0.815915	-0.05935	0.4852	0.134532	0.02736	0.646	0.84953	0	0	0	2	16.151	7.8503	3.92	0.95	0.07261	0.499	0.265	0.15932	0.563	0.94	1	0	0	4	16.607	6.9873	3.99	0.9	0.00715	0.565	0.223	0.09386	0.25	1.15	1
4	22	2	1	4	12.779	5.4005	3.49728	0.797567	0.01355	2	13.973	6.1579	3.65365	0.87701	0.05845	0.156375	0.0794425	0.0449	0.447	0.71006	0	1	0.43828	3	15	7.2906	3.78	0.92	0.07353	0.287	0.119	0.05998	0.625	0.83	0	0	0	1	15.824	9.6273	3.85	1.05	0.18807	0.354	0.248	0.17452	0.271	0.99	1
5	22	2	1	1	11.698	4.2874	3.3598	0.665347	-0.08831	4	13.92	5.3295	3.6689	0.77204	-0.04989	0.3091	0.106692	0.03842	0.417	0.83708	0	0	0	3	13.748	5.3383	3.65	0.78	-0.03775	0.287	0.115	0.05055	0.277	0.95	0	1	0.49275	2	15.569	5.7586	3.88	0.78	-0.08855	0.523	0.111	-0.00025	0.104	1	1
6	23	1	1	1	13.176	5.5832	3.5468	0.82109	0.02613	2	15.521	7.432	3.83403	0.98179	0.12339	0.287225	0.1607	0.09726	0.75	0.681	0	0	0	4	14.633	6.8997	3.72	0.96	0.12679	0.174	0.135	0.10065	0.766	0.72	1	1	0.4745	3	16.111	7.4757	3.91	0.99	0.11482	0.366	0.165	0.08869	0.438	0.85	1
7	20	1	1	1	11.663	4.4698	3.35405	0.708205	-0.04418	2	13.833	5.4842	3.64955	0.778033	-0.03962	0.2955	0.0698275	0.00456	0.708	0.8545	0	0	0	3	14.613	6.2591	3.75	0.85	0.01016	0.392	0.146	0.05434	0.83	0.81	0	1	0.47085	4	15.659	6.5756	3.88	0.88	0.01145	0.521	0.169	0.05562	0.723	0.94	2
8	21	1	1	1	13.052	4.9865	3.54162	0.755153	-0.03866	4	14.911	6.1752	3.78353	0.847172	-7e-05	0.2419	0.09202	0.03859	0.5	0.82174	0	0	0	2	15.747	6.5392	3.88	0.88	0.01145	0.343	0.125	0.05011	0.5	0.86	2	0	0	3	16.256	6.8198	3.94	0.9	0.01819	0.401	0.144	0.05686	0.188	1	1
9	30	1	1	1	12.887	4.9343	3.52695	0.722302	-0.06827	3	16.228	6.8358	3.94327	0.884158	0.00163	0.416325	0.161855	0.0699	0.521	0.8846	0	0	0	2	16.122	7.1514	3.91	0.95	0.07482	0.384	0.228	0.14309	0.521	0.99	6	0	0	4	18.584	8.7452	4.2	1.02	0.08076	0.67	0.302	0.14904	0.25	1.2	0
10	23	2	1	2	12.188	4.9551	3.41902	0.767145	0.00041	3	15.392	6.5835	3.8416	0.911678	0.0516	0.422575	0.144533	0.05119	0.319	0.89541	0	1	0.5506	4	15.35	7.5547	3.82	0.94	0.0847	0.402	0.177	0.08429	0.522	0.78	1	2	1.0033	1	17.082	6.929	4.05	0.89	-0.0161	0.628	0.126	-0.01651	0.125	1.04	2
11	24	1	1	2	14.547	5.4653	3.74605	0.771273	-0.0677	4	18.785	7.5032	4.25708	0.934575	-0.01727	0.511025	0.163302	0.05043	0.5	0.87372	0	0	0	3	18.789	8.1511	4.24	0.98	0.03193	0.494	0.211	0.09962	0.625	0.96	1	0	0	1	19.59	7.9269	4.33	0.95	-0.01795	0.589	0.176	0.04975	0.208	1.24	0
12	32	1	1	3	14.861	5.6061	3.77983	0.769413	-0.07702	2	18.823	8.3191	4.2414	0.959425	0.01105	0.461575	0.190013	0.08806	0.479	0.73895	2	0	0	4	19.096	8.974	4.25	1.05	0.09972	0.47	0.285	0.17674	0.447	0.77	6	1	0.46008	1	19.831	8.9959	4.35	0.98	0.00763	0.574	0.214	0.08465	0.191	0.86	4
13	20	1	1	3	13.618	6.2904	3.5992	0.894245	0.08771	4	16.04	8.4862	3.88868	1.12678	0.2563	0.289475	0.23253	0.16859	0.739	0.65783	9	2	1.2045	2	16.794	8.8297	3.97	1.09	0.20157	0.373	0.2	0.11385	0.848	0.72	6	2	0.7516	1	17.655	8.9744	4.08	1.06	0.14727	0.477	0.167	0.05956	0.563	0.73	6
14	28	1	1	4	12.475	4.6317	3.46897	0.71311	-0.06466	3	14.629	6.4888	3.7415	0.911497	0.07353	0.272525	0.198387	0.13819	0.667	0.88695	0	0	0	2	14.579	7.1172	3.72	0.97	0.13679	0.255	0.253	0.20144	0.688	0.84	2	0	0	1	15.581	7.2725	3.85	0.97	0.10807	0.38	0.255	0.17273	0.479	0.82	1
15	30	1	1	2	11.428	4.0512	3.3276	0.65535	-0.09119	1	14.579	5.6241	3.74622	0.79731	-0.0417	0.418625	0.14196	0.04949	0.583	0.9212	0	0	0	4	13.366	5.2349	3.59	0.78	-0.0245	0.266	0.129	0.06669	0.702	0.94	1	1	0.58688	3	14.931	6.1799	3.79	0.82	-0.02868	0.463	0.168	0.06252	0.447	1.04	0
16	21	2	1	2	16.182	5.7454	3.9512	0.766142	-0.11814	1	18.416	6.8193	4.22128	0.840557	-0.10338	0.270075	0.074415	0.01476	0.458	0.95035	0	0	0	3	18.694	7.2364	4.24	0.89	-0.05807	0.289	0.12	0.06007	0.553	0.97	0	1	0.43462	4	21.059	8.5764	4.5	0.99	-0.0155	0.546	0.219	0.10264	0.292	1.03	3
17	28	2	1	3	12.48	4.27	3.47903	0.65136	-0.12863	1	15.713	5.6913	3.89482	0.765293	-0.10654	0.4158	0.113933	0.02209	0.771	0.74055	0	0	0	4	15.33	5.676	3.85	0.78	-0.08193	0.372	0.128	0.0467	0.792	0.79	0	0	0	2	16.712	6.1771	4.01	0.81	-0.08727	0.536	0.156	0.04136	0.417	0.94	0
18	48	2	1	4	17.177	6.1234	4.07177	0.779432	-0.13148	1	19.639	7.7244	4.35135	0.889593	-0.08307	0.279575	0.11016	0.04841	0.583	0.77258	0	0	0	3	18.026	7.794	4.16	0.93	-0.0004	0.087	0.153	0.13108	0.604	0.78	2	0	0	2	20.473	8.3115	4.44	0.94	-0.05225	0.366	0.164	0.07923	0.438	0.85	0
19	24	1	1	4	11.672	4.1665	3.36207	0.668053	-0.0861	1	15.231	6.2388	3.82935	0.817943	-0.03942	0.467275	0.14989	0.04668	0.75	0.60087	0	0	0	2	15.296	6.5137	3.83	0.86	0.00249	0.472	0.194	0.08859	0.809	0.65	2	1	0.40023	3	17.071	7.662	4.03	0.96	0.05831	0.667	0.296	0.14442	0.63	0.69	1
20	24	1	1	2	11.015	4.15	3.2576	0.688662	-0.04242	3	14.979	7.1266	3.7673	0.94458	0.10092	0.5097	0.255918	0.14334	0.83	0.64512	3	1	0.42025	1	15.116	7.97	3.77	1.01	0.16574	0.517	0.318	0.20816	0.787	0.67	3	1	0.48725	4	15.778	7.8507	3.85	1.01	0.14807	0.595	0.318	0.19049	0.667	0.8	1
21	30	1	1	4	12.291	4.8624	3.43845	0.760297	-0.01073	3	14.543	6.085	3.74333	0.868835	0.03047	0.304875	0.108537	0.0412	0.729	0.92413	2	0	0	1	15.883	6.4648	3.91	0.84	-0.03518	0.468	0.084	-0.02445	0.75	1.11	2	0	0	2	16.664	6.682	4	0.88	-0.01506	0.565	0.117	-0.00433	0.333	1.28	2
22	20	2	1	3	27.221	8.4708	5.14982	0.85451	-0.29452	4	26.426	9.102	5.0639	0.92809	-0.20196	-0.085925	0.07358	0.09256	0.396	1.1185	1	0	0	1	24.003	8.0253	4.83	0.85	-0.22839	-0.318	0	0.06613	0.479	1.04	0	0	0	2	26.23	9.1626	5.04	0.93	-0.19477	-0.109	0.077	0.09975	0.208	1.49	0
23	42	2	1	3	11.838	4.3686	3.38115	0.680708	-0.07766	2	15.741	5.6517	3.90623	0.761003	-0.11334	0.525075	0.080295	-0.03568	0.638	0.75881	0	1	0.37672	1	15.664	5.821	3.9	0.78	-0.09297	0.515	0.097	-0.01531	0.833	0.91	5	0	0	4	17.242	6.186	4.09	0.78	-0.13494	0.708	0.1	-0.05728	0.521	1	0
24	27	1	1	4	11.731	4.3515	3.36287	0.696505	-0.05783	2	13.897	5.8205	3.65152	0.851185	0.0331	0.28865	0.15468	0.09092	0.604	0.81355	0	0	0	1	14.125	6.2094	3.68	0.88	0.05562	0.314	0.184	0.11345	0.617	0.77	0	1	0.4183	3	15.422	6.2882	3.85	0.86	-0.00193	0.484	0.16	0.0559	0.333	1	1
25	50	1	1	1	12.815	4.8979	3.51342	0.73859	-0.049	3	16.347	7.9402	3.93175	1.0193	0.13932	0.418325	0.280712	0.18831	0.444	0.78733	1	3	2.0629	4	17.057	8.5872	4.02	1.08	0.18052	0.504	0.341	0.22952	0.596	0.72	1	1	0.57047	2	18.783	10.311	4.18	1.18	0.24518	0.666	0.446	0.29418	0.25	0.94	2
26	32	1	1	2	12.011	4.3	3.40607	0.6636	-0.10027	4	14.22	5.4759	3.70297	0.78198	-0.04747	0.2969	0.11838	0.0528	0.729	0.68028	0	0	0	1	15.448	6.4053	3.85	0.85	-0.01193	0.445	0.185	0.08835	0.729	0.79	0	0	0	3	15.295	6.0301	3.84	0.82	-0.03972	0.431	0.155	0.06056	0.396	0.83	0
27	27	2	1	3	11.79	4.6837	3.35827	0.733185	-0.02013	1	15.772	8.3963	3.87263	0.909458	0.04253	0.51435	0.176272	0.06266	0.438	0.67027	1	0	0	2	14.605	6.1208	3.75	0.83	-0.00984	0.389	0.093	0.01029	0.5	0.74	0	0	0	4	15.586	8.2002	3.86	0.93	0.06586	0.5	0.192	0.08599	0.34	0.78	1
28	33	2	1	4	13.058	5.1849	3.53952	0.775933	-0.01742	2	16.026	6.6471	3.91965	0.897267	0.01996	0.380125	0.121335	0.03737	0.375	0.85972	0	0	0	3	15.369	6.5979	3.84	0.92	0.06028	0.297	0.142	0.0777	0.5	0.81	0	0	0	1	16.959	6.9751	4.03	0.91	0.00831	0.495	0.13	0.02573	0.25	1.04	0
29	22	2	1	1	13.159	4.5559	3.57227	0.669697	-0.13089	4	16.089	6.1119	3.95	0.81088	-0.07314	0.377725	0.141182	0.05775	0.383	0.8354	0	1	0.30428	3	16.436	7.0119	3.97	0.89	0.00157	0.402	0.216	0.13245	0.333	0.93	1	0	0	2	18.615	7.41	4.24	0.88	-0.06807	0.665	0.214	0.06282	0.167	1.43	0
30	31	2	1	1	12.503	4.5519	3.47593	0.703632	-0.07567	2	15.926	5.8439	3.92715	0.793613	-0.08536	0.451225	0.08998	-0.00969	0.438	0.90902	1	0	0	4	15.616	5.9776	3.88	0.82	-0.04855	0.408	0.113	0.02712	0.313	1.06	3	0	0	3	16.747	6.0457	4.03	0.81	-0.09169	0.559	0.108	-0.01602	0.188	1	0
31	23	2	1	1	12.326	4.5552	3.45265	0.7118	-0.06236	2	16.253	6.5701	3.95645	0.870355	-0.01509	0.5038	0.158555	0.04728	0.604	0.81282	0	0	0	3	16.343	6.7923	3.97	0.89	0.00157	0.519	0.181	0.06393	0.771	0.83	2	0	0	4	19.318	8.2416	4.3	1	0.03868	0.845	0.29	0.10104	0.292	0.8	1
32	22	2	1	1	12.747	4.7035	3.50782	0.70578	-0.08057	4	14.913	6.5506	3.7781	0.91897	0.07292	0.270275	0.21319	0.15349	0.891	0.7555	2	2	0.74082	2	15.183	6.9592	3.8	0.92	0.06912	0.295	0.212	0.14968	0.87	0.72	0	2	1.1285	3	16.481	8.0272	3.95	1.02	0.13598	0.439	0.316	0.21655	0.532	0.63	3
33	35	2	1	1	13.357	5.234	3.58228	0.753563	-0.04923	3	14.448	6.1805	3.71525	0.877622	0.04546	0.132975	0.12406	0.09469	0.417	0.82488	0	0	0	2	15.474	7.141	3.84	0.93	0.07028	0.255	0.174	0.11951	0.563	0.94	1	0	0	4	15.682	6.7566	3.87	0.9	0.03365	0.289	0.15	0.08289	0.229	1.09	1
34	34	1	2	2	13.268	6.1111	3.54913	0.866383	0.07091	3	16.54	7.7002	3.96407	0.972765	0.08564	0.41495	0.106383	0.01473	0.617	0.87143	2	1	0.4492	4	19.071	11.008	4.21	1.19	0.24856	0.663	0.323	0.17764	0.542	0.88	2	0	0	1	16.381	7.3996	3.94	0.97	0.08819	0.392	0.101	0.01728	0.333	0.91	1
35	24	2	1	2	17.08	8.6874	4.00692	1.00509	0.1085	4	19.671	9.1268	4.31722	1.05065	0.08552	0.3103	0.0455625	-0.02298	0.511	0.76512	1	1	0.46897	3	21.815	10.596	4.53	1.13	0.11787	0.528	0.127	0.00938	0.438	0.93	1	0	0	1	23.958	11.665	4.76	1.17	0.10707	0.749	0.166	-0.00143	0.362	0.84	2
36	40	2	1	3	12.094	4.3211	3.41958	0.666693	-0.10016	2	15.786	6.5996	3.89295	0.882898	0.01148	0.473375	0.216205	0.11165	0.574	0.73214	2	1	0.39475	4	14.984	6.0879	3.8	0.86	0.00912	0.379	0.191	0.10928	0.646	0.84	2	0	0	1	17.395	8.1915	4.08	0.94	0.02727	0.659	0.274	0.12743	0.277	0.87	1
37	38	1	1	3	12.546	4.5182	3.48712	0.683163	-0.09861	4	16.029	6.6774	3.93092	0.880912	0.00111	0.4438	0.19775	0.09972	0.563	0.97472	0	0	0	2	16.296	6.4433	3.97	0.86	-0.02843	0.485	0.174	0.07018	0.522	0.85	0	2	0.9962	1	17.732	8.67	4.11	1	0.08064	0.623	0.313	0.17926	0.313	1.16	0
38	47	2	1	4	13.894	4.9376	3.66915	0.719283	-0.1027	3	17.731	7.7592	4.12255	0.96436	0.04223	0.4534	0.245078	0.14493	0.75	0.8111	1	0	0	2	17.301	7.3496	4.08	0.93	0.01727	0.409	0.213	0.11997	0.689	0.78	0	3	1.7498	1	20.438	8.7812	4.43	1	0.00996	0.759	0.282	0.11266	0.333	0.93	0
39	22	2	1	2	12.264	4.9676	3.42935	0.752607	-0.01641	1	15.424	5.9301	3.85555	0.8048	-0.05835	0.4262	0.0521925	-0.04195	0.417	0.75688	0	0	0	4	14.344	6.5666	3.7	0.89	0.0612	0.275	0.142	0.07761	0.438	0.76	2	0	0	3	14.88	6.5683	3.78	0.91	0.06353	0.348	0.159	0.07994	0.229	0.84	0
40	48	2	1	2	15.643	5.5779	3.89082	0.75627	-0.11468	1	19.766	7.6728	4.36773	0.887955	-0.08833	0.4769	0.131685	0.02635	0.438	0.65388	0	0	0	3	17.945	8.4104	4.15	0.98	0.05181	0.263	0.22	0.16648	0.771	0.8	2	0	0	4	20.684	8.8073	4.45	1.01	0.01554	0.557	0.256	0.13022	0.319	0.95	1
41	47	1	1	3	13.693	4.6867	3.6458	0.684837	-0.13199	1	17.872	7.7754	4.135	0.942975	0.0181	0.4892	0.258138	0.15008	0.25	0.74635	1	0	0	4	17.195	7.124	4.06	0.89	-0.01831	0.416	0.209	0.11367	0.435	0.94	1	2	0.92535	2	18.424	7.4044	4.21	0.89	-0.05144	0.566	0.207	0.08054	0.25	0.98	4
42	47	1	1	4	12.572	4.4355	3.49207	0.688597	-0.09427	1	15.832	5.9444	3.91708	0.800353	-0.07639	0.425	0.111755	0.01788	0.208	0.87862	0	0	0	3	17.12	8.1005	4.03	0.99	0.08831	0.542	0.302	0.18259	0.438	1.01	4	0	0	2	16.82	7.1785	4.02	0.9	0.00052	0.529	0.215	0.0948	0.104	1	1
43	40	1	2	4	11.922	4.7172	3.38243	0.741993	-0.01666	1	14.833	6.3131	3.76532	0.872015	0.02879	0.3829	0.130023	0.04545	0.277	0.90469	0	1	0.45465	2	15.01	6.7121	3.79	0.9	0.05132	0.404	0.158	0.06798	0.681	0.89	1	1	0.49083	3	15.401	7.2687	3.82	1	0.1447	0.434	0.259	0.16136	0.063	0.94	1
44	43	1	1	2	11.801	4.8555	3.3603	0.771485	0.01772	3	15.064	6.667	3.79135	0.91548	0.06651	0.43105	0.143995	0.04879	0.646	0.7404	3	0	0	1	14.333	6.2775	3.7	0.89	0.0612	0.339	0.114	0.04348	0.5	0.96	3	0	0	4	15.471	6.9378	3.84	0.94	0.08028	0.48	0.173	0.06256	0.208	1.05	1
45	42	1	1	4	11.736	4.7544	3.35387	0.750315	-0.00203	3	15.066	6.247	3.80273	0.865023	0.01354	0.44885	0.114708	0.01557	0.5	0.76132	1	0	0	1	17.029	8.192	4.03	0.95	0.04831	0.681	0.2	0.05034	0.771	0.74	0	0	0	2	17.287	7.4821	4.07	0.95	0.03948	0.712	0.202	0.04151	0.354	0.92	2
46	46	2	1	3	12.658	5.1821	3.47845	0.756117	-0.02374	4	16.941	7.386	4.01585	0.940305	0.04174	0.5374	0.184188	0.06549	0.489	0.64207	1	1	0.384	1	15.172	6.058	3.82	0.82	-0.0353	0.344	0.065	-0.01156	0.553	0.76	5	1	0.26075	2	18.442	8.0048	4.2	0.95	0.01076	0.721	0.19	0.03451	0.313	0.89	0
47	47	2	1	3	12.872	4.4956	3.53523	0.671505	-0.1209	2	15.824	5.7394	3.9229	0.767382	-0.11065	0.387675	0.0958775	0.01025	0.646	0.73155	0	0	0	1	16.309	6.1737	3.98	0.8	-0.09064	0.445	0.13	0.03025	0.729	0.76	1	0	0	4	16.464	6.3869	3.99	0.84	-0.05285	0.457	0.17	0.06805	0.583	0.93	0
48	48	2	1	4	13.791	4.8341	3.65375	0.68848	-0.1301	2	16.138	6.3292	3.94658	0.8519	-0.03136	0.292825	0.16342	0.09874	0.638	0.62148	3	1	0.41478	1	18.187	7.6281	4.18	0.92	-0.01482	0.531	0.227	0.11528	0.729	0.76	0	0	0	3	17.255	7.3575	4.07	0.92	0.00948	0.413	0.236	0.13958	0.438	0.88	3
49	41	1	1	3	11.454	4.3474	3.32333	0.70181	-0.04379	4	15.146	6.5142	3.82012	0.846385	-0.00894	0.4968	0.144575	0.03484	0.766	0.71545	0	1	0.33143	1	14.653	5.6762	3.77	0.8	-0.04426	0.442	0.094	-0.00047	0.915	0.72	1	1	0.41657	2	15.504	6.0152	3.87	0.82	-0.04635	0.55	0.123	-0.00256	0.521	0.88	0
[truncated: 3 more columns]

## Sheet: Metadata
Column	Variable Name	Variable Type	Categories?	Description
A	P_ID	Demographic	n/a	Unique participant ID number
B	Age	Demographic	n/a	Age of participant in years
C	Gender	Demographic	1 = Male; 2 = Female	Gender of participant
D	Handedness	Demographic	1 = Right-handed; 2 = Left-handed	Hand with which participant interacted with the touch-screen
E	C_Order_ST	Single Target Condition	1st, 2nd, 3rd or 4th	The position of the single-target condition within the counterbalance order
F	mean_ST	Single Target Condition	n/a	mean tracking error (in mm) during the single-target condition
G	stddev_ST	Single Target Condition	n/a	standard deviation of tracking error (in mm) during the single-target condition
H	TE_ST	Single Target Condition	n/a	Tracking Error outcome variable: square-root transformation of the mean tracking error during single-target condition (i.e. to normalise distribution)
I	IIV_ST	Single Target Condition	n/a	Intra-Individual Variability: square-root transformation of the standard deviation of the tracking error during single-target (i.e. to normalise distribution)
J	RIIV_ST	Single Target Condition	n/a	Residual Intra-Individual Variability: residual of the square-root transformation of the standard deviation (Column I) of the tracking error during single-target (i.e. to normalise distribution) after regressing out shared variance with TE_ST (Column H)
K	C_Order_C	Colour Target Condition	1st, 2nd, 3rd or 4th	The position of the coloured-targets cue-detection condition within the counterbalance order
L	mean_C	Colour Target Condition	n/a	mean tracking error (in mm) during the coloured-targets cue-detection condition
M	stddev_C	Colour Target Condition	n/a	standard deviation of tracking error (in mm) during the coloured-targets cue-detection condition
N	TE_C	Colour Target Condition	n/a	Tracking Error outcome variable: square-root transformation of the mean tracking error during coloured-targets cue-detection condition (i.e. to normalise distribution)
O	IIV_C	Colour Target Condition	n/a	Intra-Individual Variability: square-root transformation of the standard deviation of the tracking error during coloured-targets cue-detection condition (i.e. to normalise distribution)
P	RIIV_C	Colour Target Condition	n/a	Residual Intra-Individual Variability: residual of the square-root transformation of the standard deviation of the tracking error during coloured-targets (Column O) cue-detection condition (i.e. to normalise distribution) after regressing out shared variance with TE_C (Column N)
Q	∆TE_C	Colour Target Condition	n/a	Cue-detection cost for Tracking Error (TE); TE during the coloured-targets cue-detection condition minus TE during the single-target condition (i.e. Column N - Column H)
R	∆IIV_C	Colour Target Condition	n/a	Cue-detection cost for Intra-Individual Variability (IIV); IIV during the coloured-targets cue-detection condition minus IIV during the single-target condition (i.e. Column O - Column I)
S	∆RIIV_C	Colour Target Condition	n/a	Cue-detection cost for Residual Intra-Individual Variability (IIV); RIIV during the coloured-targets cue-detection condition minus RIIV during the single-target condition (i.e. Column P - Column J)
T	CorrectRs_C	Colour Target Condition	n/a	Correct reactions: Proportion of valid cues correctly reacted to during the coloured-targets cue-detection condition
U	mRT_C	Colour Target Condition	n/a	mean reaction time: mean reaction time in seconds for all correct reactions made during the coloured-targets cue-detection condition
V	FalseRs_C	Colour Target Condition	n/a	False reactions: number of reactions made during the coloured-targets cue-detection condition that were not correct reactions (Column T)
W	IndMovs_C	Colour Target Condition	n/a	Indeterminate Movements: number of instances during the coloured-targets cue-detection condition when movement could not be confidently differentiated into tracking or cue-reaction behaviour
X	IndMovs_per_C	Colour Target Condition	n/a	Percentage of overall sampled datapoints recorded for the coloured-targets cue-detection condition that were excluded after being classified as IndMovs (Column W)
Y	C_Order_Sh	Shaped Target Condition	1st, 2nd, 3rd or 4th	The position of the shaped-targets cue-detection condition within the counterbalance order
Z	mean_Sh	Shaped Target Condition	n/a	mean tracking error (in mm) during the shaped-targets cue-detection condition
AA	stddev_Sh	Shaped Target Condition	n/a	standard deviation of tracking error (in mm) during the shaped-targets cue-detection condition
AB	TE_Sh	Shaped Target Condition	n/a	Tracking Error outcome variable: square-root transformation of the mean tracking error during shaped-targets cue-detection condition (i.e. to normalise distribution)
AC	IIV_Sh	Shaped Target Condition	n/a	Intra-Individual Variability: square-root transformation of the standard deviation of the tracking error during shaped-targets cue-detection condition (i.e. to normalise distribution)
AD	RIIV_Sh	Shaped Target Condition	n/a	Residual Intra-Individual Variability: residual of the square-root transformation of the standard deviation of the tracking error during shaped-targets (Column AC) cue-detection condition (i.e. to normalise distribution) after regressing out shared variance with TE_Sh (Column AB)
AE	∆TE_Sh	Shaped Target Condition	n/a	Cue-detection cost for Tracking Error (TE); TE during the shaped-targets cue-detection condition minus TE during the single-target condition (i.e. Column AB - Column H)
AF	∆IIV_Sh	Shaped Target Condition	n/a	Cue-detection cost for Intra-Individual Variability (IIV); IIV during the shaped-targets cue-detection condition minus IIV during the single-target condition (i.e. Column AC - Column I)
AG	∆RIIV_Sh	Shaped Target Condition	n/a	Cue-detection cost for Residual Intra-Individual Variability (IIV); RIIV during the shaped-targets cue-detection condition minus RIIV during the single-target condition (i.e. Column AD - Column J)
AH	CorrectRs_Sh	Shaped Target Condition	n/a	Correct reactions: Proportion of valid cues correctly reacted to during the shaped-targets cue-detection condition
AI	mRT_Sh	Shaped Target Condition	n/a	mean reaction time: mean reaction time in seconds for all correct reactions made during the shaped-targets cue-detection condition
AJ	FalseRs_Sh	Shaped Target Condition	n/a	False reactions: number of reactions made during the shaped-targets cue-detection condition that were not correct reactions (Column AI)
AK	IndMovs_Sh	Shaped Target Condition	n/a	Indeterminate Movements: number of instances during the shaped-targets cue-detection condition when movement could not be confidently differentiated into tracking or cue-reaction behaviour
AL	IndMovs_per_Sh	Shaped Target Condition	n/a	Percentage of overall sampled datapoints recorded for the shaped-targets cue-detection condition that were excluded after being classified as IndMovs (Column AK)
AM	C_Order_Cm	Combined1 Target Condition	1st, 2nd, 3rd or 4th	The position of the combined-targets cue-detection condition within the counterbalance order
AN	mean_Cm	Combined1 Target Condition	n/a	mean tracking error (in mm) during the combined-targets cue-detection condition
AO	stddev_Cm	Combined1 Target Condition	n/a	standard deviation of tracking error (in mm) during the combined-targets cue-detection condition
AP	TE_Cm	Combined1 Target Condition	n/a	Tracking Error outcome variable: square-root transformation of the mean tracking error during combined-targets cue-detection condition (i.e. to normalise distribution)
AQ	IIV_Cm	Combined1 Target Condition	n/a	Intra-Individual Variability: square-root transformation of the standard deviation of the tracking error during combined-targets cue-detection condition (i.e. to normalise distribution)
AR	RIIV_Cm	Combined1 Target Condition	n/a	Residual Intra-Individual Variability: residual of the square-root transformation of the standard deviation of the tracking error during combined-targets (Column AQ) cue-detection condition (i.e. to normalise distribution) after regressing out shared variance with TE_Cm (Column AP)
AS	∆TE_Cm	Combined1 Target Condition	n/a	Cue-detection cost for Tracking Error (TE); TE during the combined-targets cue-detection condition minus TE during the single-target condition (i.e. Column AS - Column H)
AT	∆IIV_Cm	Combined1 Target Condition	n/a	Cue-detection cost for Intra-Individual Variability (IIV); IIV during the combined-targets cue-detection condition minus IIV during the single-target condition (i.e. Column AT - Column I)
AU	∆RIIV_Cm	Combined1 Target Condition	n/a	Cue-detection cost for Residual Intra-Individual Variability (IIV); RIIV during the combined-targets cue-detection condition minus RIIV during the single-target condition (i.e. Column AU - Column J)
AV	CorrectRs_Cm	Combined1 Target Condition	n/a	Correct reactions: Proportion of valid cues correctly reacted to during the combined-targets cue-detection condition
AW	mRT_Cm	Combined1 Target Condition	n/a	mean reaction time: mean reaction time in seconds for all correct reactions made during the combined-targets cue-detection condition
AX	FalseRs_Cm	Combined1 Target Condition	n/a	False reactions: number of reactions made during the combined-targets cue-detection condition that were not correct reactions (Column AW)
AY	IndMovs_Cm	Combined1 Target Condition	n/a	Indeterminate Movements: number of instances during the combined-targets cue-detection condition when movement could not be confidently differentiated into tracking or cue-reaction behaviour
AZ	IndMovs_per_Cm	Combined1 Target Condition	n/a	Percentage of overall sampled datapoints recorded for the combined-targets cue-detection condition that were excluded after being classified as IndMovs (Column AY)
BA	Avg_FR_Cat	All Cue Detection Conditions	<0.5 FRs; 0.5 ≤ FRs <1; ≥1 FRs	Average number of false reactions (FRs) per cue-detection condition. Categorical variable stratified into 3 bands
Notes: 1 "Combined" refers to the Cue-detection condition where targets were unique from one another on the basis of their shape and colour
